# Supplementary material for: Metabolic Response in Endothelial Cells to Catecholamine Stimulation Associated with Increased Vascular Permeability
Source: MDPI journal article supplement (doi:10.3390/ijms23063162), 2022-03-15
Supplement: s1 [file s1]

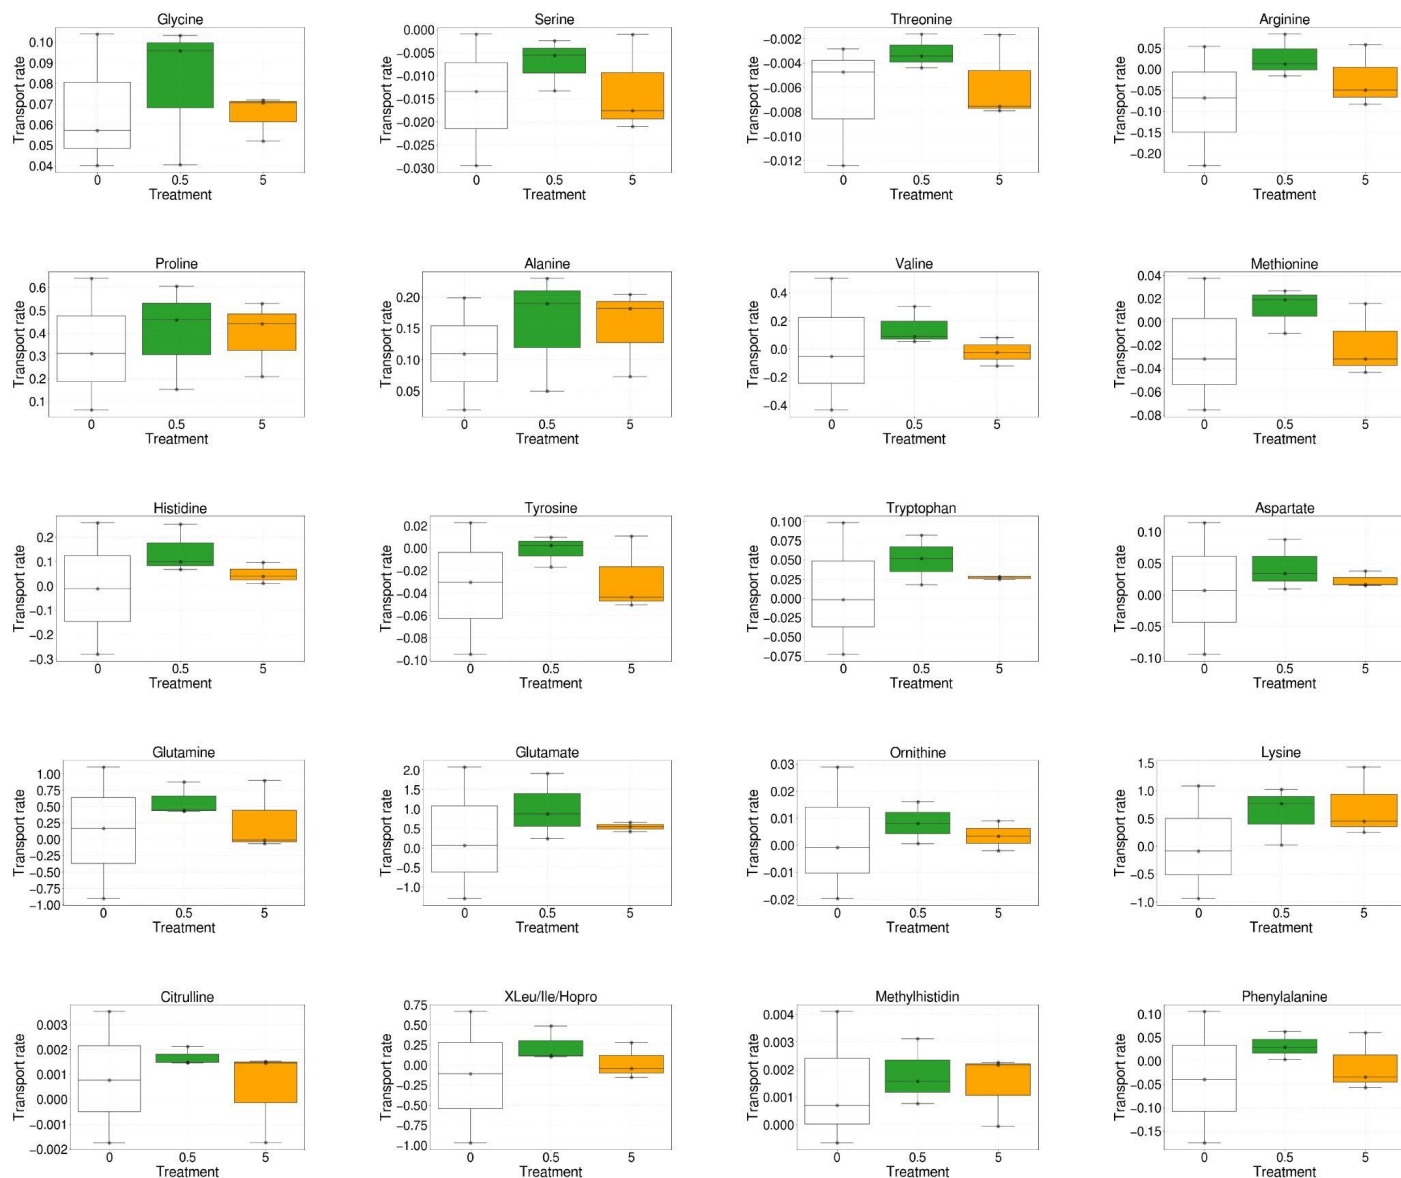

### Supplementary Information Figure SIF1 | Effect of adrenaline-noradrenaline treatment on amino acid transport rates.

Positive rates indicate secretion; negative rates indicate uptake. Transport rate units are  $\mu\text{M} \times 10^3 \text{ cells}^{-1} \times \text{day}^{-1}$ . We found no particular trend in amino acid transport rates associated with treatment (0.5 and 5  $\mu\text{M}$  of equimolar adrenaline-noradrenaline mix).

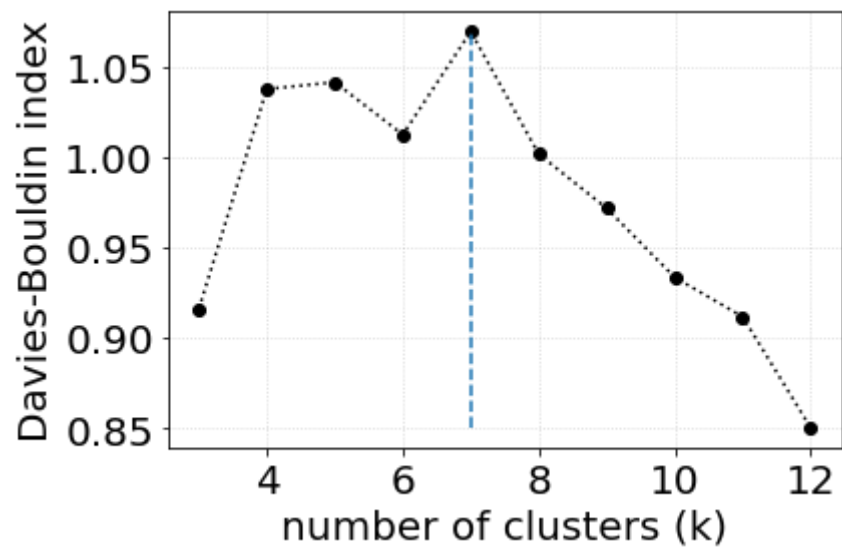

**Supplementary Information Figure SIF2 | Quantitative identification of the optimal clustering partition.**

We used the Davies-Bouldin index to quantitatively assess the optimal number of clusters. Blue dashed line marks the maximum value found, indicating that our dose-responding metabolic features are best grouped together into seven clusters.
